# Supplementary material
Source: PubMed Central journal article supplement (PMC3883310)
Supplement: NIHMS535844-supplement-Supp_Fig_1.pdf [file NIHMS535844-supplement-Supp_Fig_1.pdf]

## Supplementary Figure 1

### Muc1 antigen expression

Negative

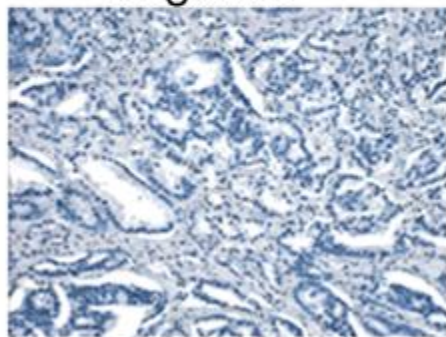

Intermediate

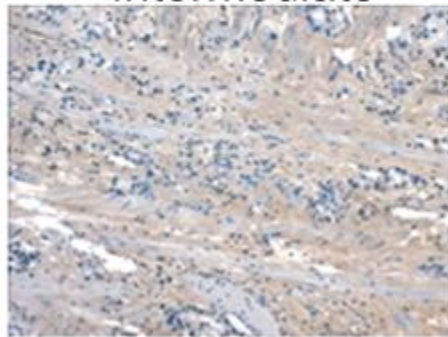

Strongly positive

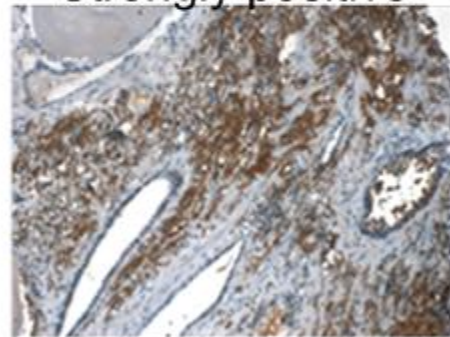

Prostate Adenocarcinoma
